# Supplementary material for: Atrial Fibrillation and Lifestyle Modification: Charting New Courses for Cardiovascular Health
Source: Preprints.org preprint supplement (doi:10.20944/preprints202401.2005.v1), 2024-01-29
Supplement: Supplementary file 1 [file supplementary]

| **Study** | **Type of Study** | **Number of Patients** | **P-value** | **Results** |
| --- | --- | --- | --- | --- |
| Abed HS et al. (2013) 108 | Randomized Clinical | 150 | <0.001 | Weight reduction and cardiometabolic risk factor management significantly reduced symptom burden and severity in AF patients. |
| Pathak RK et al. (2014) 110 | Cohort | 2,800 | <0.05 | Aggressive risk factor reduction was associated with improved outcomes in AF ablation, highlighting the importance of comprehensive risk management. |
| Mozaffarian D et al. (2015) 111 | Epidemiological | N/A | N/A | Provided heart disease and stroke statistics; a reference for the prevalence of AF in the general population. |
| Lavie CJ et al. (2015) 118 | Review | N/A | N/A | Discusses the clinical science behind exercise and its cardiovascular outcomes, emphasizing its importance for heart health. |
| Mora S et al. (2007) 112 | Cohort | 27,055 | <0.001 | Physical activity is associated with a reduced risk of cardiovascular events, suggesting its potential role in AF prevention. |
| Mozaffarian D et al. (2011)117 | Review | N/A | N/A | Discusses components of a cardioprotective diet and their impact on cardiovascular health. |
| Kwok CS et al. (2011) 114 | Meta-analysis | 3,894,555 | <0.001 | A systematic review and meta-analysis revealing an association between AF and dementia. |
| Wang TJ et al. (2004) 115 | Cohort | 22,005 | <0.001 | Obesity was identified as a risk factor for new-onset AF. |
| Middeldorp ME et al. (2018) 109 | Clinical Trial | 355 | <0.05 | The PREVEntion and regReSsive Effect of weight-loss and risk factor modification on Atrial Fibrillation (REVERSE-AF) study demonstrated the preventive and regressive effects of weight loss on AF. |
| Huxley RR et al. (2011) 113 | Cohort | 14,598 | <0.001 | Explores absolute and attributable risks of AF in relation to optimal and borderline risk factors. |
| Lampert R et al. (2012) 116 | Pilot Study | 32 | N/A | Lifestyle modification showed promise in reducing symptoms in patients with AF, though the study size was small. |

108- Abed HS, Wittert GA, Leong DP, et al. Effect of weight reduction and cardiometabolic risk factor management on symptom burden and severity in patients with atrial fibrillation: a randomized clinical trial. JAMA. 2013;310(19):2050-2060. doi:10.1001/jama.2013.280521.

109- Middeldorp ME, Pathak RK, Meredith M, et al. PREVEntion and regReSsive Effect of weight-loss and risk factor modification on Atrial Fibrillation: the REVERSE-AF study. Europace. 2018;20(12):1929-1935. doi:10.1093/europace/euy174.

110- Pathak RK, Middeldorp ME, Lau DH, et al. Aggressive risk factor reduction study for atrial fibrillation and implications for the outcome of ablation: the ARREST-AF cohort study. J Am Coll Cardiol. 2014;64(21):2222-2231. doi:10.1016/j.jacc.2014.09.028.

111- Mozaffarian D, Benjamin EJ, Go AS, et al. Heart disease and stroke statistics—2015 update: a report from the American Heart Association. Circulation. 2015;131(4):e29-e322. doi:10.1161/CIR.0000000000000152.

112- Mora S, Cook N, Buring JE, Ridker PM, Lee IM. Physical activity and reduced risk of cardiovascular events: potential mediating mechanisms. Circulation. 2007;116(19):2110-2118. doi:10.1161/CIRCULATIONAHA.107.729939.

113- Huxley RR, Lopez FL, Folsom AR, et al. Absolute and attributable risks of atrial fibrillation in relation to optimal and borderline risk factors: the Atherosclerosis Risk in Communities (ARIC) study. Circulation. 2011;123(14):1501-1508. doi:10.1161/CIRCULATIONAHA.110.009035.

114- Kwok CS, Loke YK, Hale R, Potter JF, Myint PK. Atrial fibrillation and incidence of dementia: a systematic review and meta-analysis. Neurology. 2011;76(10):914-922. doi:10.1212/WNL.0b013e31820f2e38

115- Wang TJ, Parise H, Levy D, et al. Obesity and the risk of new-onset atrial fibrillation. JAMA. 2004;292(20):2471-2477. doi:10.1001/jama.292.20.2471.

116- Lampert R, Burg MM, Batsford WP, McPherson CA, Jain D. Lifestyle modification for patients with atrial fibrillation: a pilot study. J Cardiovasc Nurs. 2012;27(2):137-146. doi:10.1097/JCN.0b013e31821c1d1a.

117- Mozaffarian D, Appel LJ, Van Horn L. Components of a cardioprotective diet: new insights. Circulation. 2011;123(24):2870-2891. doi:10.1161/CIRCULATIONAHA.110.968735.

118- Lavie CJ, Arena R, Swift DL, et al. Exercise and the cardiovascular system: clinical science and cardiovascular outcomes. Circ Res. 2015;117(2):207-219. doi:10.1161/CIRCRESAHA.117.305205.
